# Supplementary material
Source: PubMed Central journal article supplement (PMC4084927)
Supplement: NIHMS591938-supplement-01.pdf [file NIHMS591938-supplement-01.pdf]

**Supplemental Table 1:** List of genes significantly up or down regulated ( $\geq 2$ -fold change) by treatment with APAP or NAPQI for 24 and 48 hours. This list includes the 199 genes depicted in **Fig. 3**. Values are the ratios respect to control condition.

| Gene    | APAP 24 | APAP 48 | NAPQI 24 | NAPQI 48 | Gene    | APAP 24 | APAP 48 | NAPQI 24 | NAPQI 48 | Gene     | APAP 24 | APAP 48 | NAPQI 24 | NAPQI 48 | Gene      | APAP 24 | APAP 48 | NAPQI 24 | NAPQI 48 |
|---------|---------|---------|----------|----------|---------|---------|---------|----------|----------|----------|---------|---------|----------|----------|-----------|---------|---------|----------|----------|
| Acadsb  | 0.29    | 0.05    |          | 3.62     | Clu     | 16.00   |         | 4.63     | 4.19     | Gadd45a  |         |         | 0.17     | 0.04     | Naip1     |         |         | 222.63   | 353.72   |
| Akt1    | 5.00    |         |          | 2.94     | Cradd   |         |         | 6.01     | 21.91    | Gpx1     |         |         |          | 2.75     | Naip2     |         |         | 54.52    | 39.87    |
| Als2cr2 | 6.00    |         |          |          | Cryaa   |         |         | 377.5    | 341.71   | Gpx2     | 0.01    | 0.05    | 176.12   | 162.08   | Nme5      |         |         | 8.77     | 13.93    |
| Api5    | 7.60    |         |          |          | Cryab   | 3.00    |         | 5.01     | 3.74     | Greb1    |         |         | 132.77   | 132.60   | Nod1      |         |         | 3.23     | 7.43     |
| Atf5    | 18.00   |         | 2.41     | 5.34     | Csf2    |         |         | 51.68    | 60.60    | Gsr      |         |         | 2.76     | 2.51     | Nol3      |         |         | 2.97     | 3.29     |
| Bad     | 27.00   | 3.30    | 2.30     | 3.28     | Cxcl1   |         |         | 8.49     | 14.74    | Gsta1    |         |         | 38.62    | 46.27    | Nos2      |         |         | 8240.06  | 2831.91  |
| Bag1    | 9.00    | 6.40    | 4.01     | 7.48     | Cxcl9   |         |         | 115.99   | 136.01   | Gstm1    |         |         | 58.32    | 24.16    | Nrip1     |         |         |          | 0.50     |
| Bax     |         |         | 11.94    | 5.22     | Cyb5r3  |         | 0.04    |          |          | Gsto1    | 3.30    | 0.02    |          |          | Nudt1     | 5.35    |         |          |          |
| Bcl2    |         |         |          | 52.41    | Cyp1a1  |         |         | 1037.69  | 939.31   | Gstp2    | 7.00    |         |          |          | Odc1      |         |         |          | 2.33     |
| Bcl2l1  |         |         |          | 3.23     | Cyp1a2  |         |         | 73.52    | 28.73    | Gstt1    |         | 0.03    |          |          | Pak7      |         |         | 830.01   | 1318.72  |
| Bcl2l2  |         |         | 11.37    | 11.96    | Cyp2c29 |         | 0.04    | 1037.69  | 939.31   | Gusb     |         |         | 0.24     | 0.36     | Pdia3     |         | 0.04    |          |          |
| Bcl2l10 |         |         | 501.93   | 797.47   | Cyp2c37 |         |         | 1217.98  | 939.31   | Gys1     |         |         |          | 0.43     | Pdia4     | 0       | 0.05    |          |          |
| Bcl10   | 3.00    |         |          |          | Cyp2c38 |         |         | 1037.69  | 2233.58  | Hells    |         |         | 0.20     | 0.35     | Pim2      |         | 0.18    |          | 2.22     |
| Bid     |         |         | 2.18     |          | Cyp2c40 |         | 0.12    | 319.8    | 838.84   | Hhip     |         |         | 20.19    | 23.67    | Pmepa1    |         |         | 3.62     | 9.19     |
| Birc2   |         |         |          | 2.52     | Cyp2d22 |         |         | 75.23    | 71.59    | Hmox1    | 2.63    |         | 14.45    | 5.59     | Polb      |         |         | 3.26     | 2.62     |
| Birc3   |         |         | 5.62     | 3.99     | Cyp2e1  |         |         | 338.92   | 306.79   | Hopx     |         |         | 7.05     | 8.06     | Pparg     |         |         | 2.06     | 2.87     |
| Birc5   |         |         | 4.59     | 3.90     | Cyp2f2  | 8.00    | 0.02    | 1037.69  | 939.31   | Hoxa1    |         |         | 9.39     | 6.78     | PPC       |         |         | 1901.06  | 1827.47  |
| Bmp2    |         |         | 253.10   | 296.77   | Cyp4a10 |         |         | 1157.93  | 1118.95  | Hprt1    |         |         | 2.10     |          | Ppid      |         |         | 4.16     | 2.45     |
| Bnip2   | 9.00    |         | 4.66     | 2.67     | Cyp4b1  |         |         | 83.99    | 76.03    | Hsf1     |         |         | 7.37     | 6.12     | Ptch1     |         |         | 4.46     | 5.23     |
| Bnip3   |         |         |          | 2.09     | Cyp7a1  |         |         | 447.67   | 405.23   | Hsp90aa1 | 11.00   |         |          |          | Pycard    | 7.80    |         | 11.59    | 18.41    |
| Bnip3l  |         |         | 2.34     | 2.73     | Cyp7b1  |         | 0.09    | 74.87    | 67.78    | Hsp110   |         | 0.04    |          |          | Rbp1      |         |         | 61.13    | 150.05   |
| Bok     | 19.60   |         | 4.21     | 4.54     | Cyp11a1 | 0.24    | 0.05    | 1037.69  | 939.31   | Hspa1a   |         | 0.02    | 6.50     | 3.09     | Ripk1     |         |         | 2.76     | 10.38    |
| Brc1    |         |         | 0.48     |          | Cyp11b2 |         |         | 217.3    | 196.70   | Hspa1l   |         | 0.03    | 3.95     | 3.63     | Rnf7      | 8.00    | 0.25    | 3.12     | 2.8      |
| Calr    |         | 0.04    |          |          | Cyp17a1 |         |         | 261.88   | 237.05   | Hspa2    |         |         | 2.28     |          | RTC       |         |         | 1626.40  | 1470.70  |
| Canx    |         | 0.04    | 0.47     | 0.42     | Cyp19a1 |         |         | 53.28    | 62.48    | Hspa4    | 14.60   |         | 184.70   | 52.92    | Sele      |         |         | 38.93    | 50.08    |
| Card6   |         |         | 3.72     | 15.73    | Dad1    | 45.00   |         | 25.85    | 41.07    | Hspa5    |         |         | 0.45     | 0.19     | Selp      |         |         | 43.43    | 50.93    |
| Card10  |         |         | 33.35    | 135.37   | Dapk1   |         |         | 883.37   | 1403.50  | Hspa9    |         |         | 2.64     |          | Serpinh1  |         |         | 4.23     |          |
| Card11  |         | 81.60   |          |          | Dffa    |         |         | 8.29     | 13.16    | Hspa12a  |         | 0.05    | 162.99   | 424.57   | Sod2      | 15.00   |         |          |          |
| Casp1   |         |         | 155.02   | 175.86   | Dffb    |         |         | 10.78    | 17.12    | Hspb1    |         | 0.13    | 5.99     | 4.99     | Sod3      |         |         | 11.13    | 10.07    |
| Casp2   | 7.60    |         |          |          | Dnaja1  |         |         | 3.11     |          | Hspb2    |         |         | 13.53    | 12.25    | Sphk2     |         |         |          | 2.84     |
| Casp3   | 12.00   |         |          |          | Dnaja2  |         |         |          | 0.40     | Hspb3    |         |         | 117.85   | 106.68   | Stip1     | 6.00    |         |          |          |
| Casp4   |         |         | 3.42     | 5.44     | Dnaja3  |         |         | 5.83     |          | Hspd1    | 13.00   |         |          |          | Sult1a1   | 0.06    |         |          |          |
| Casp6   |         |         | 2.09     |          | Dnaja4  |         |         | 7.08     |          | Hspe1    | 15.00   |         | 3.33     | 2.76     | Tank      |         |         |          | 0.19     |
| Casp7   |         |         | 2.84     |          | Dnajb1  | 3.10    |         |          |          | Hyou1    |         | 0.21    |          |          | Tcf7      |         |         | 2.57     | 3.02     |
| Casp8   |         |         | 6.83     | 31.91    | Dnajb5  |         |         | 4.22     | 3.12     | Icam1    |         |         | 138.74   | 162.68   | Tcp1      |         |         |          | 2.29     |
| Casp9   |         |         | 2.97     | 8.37     | Dnajb6  |         |         | 11.87    |          | Igfbp3   |         |         | 30.71    | 36.01    | Tert      |         |         | 29.09    | 34.11    |
| Casp12  |         |         | 17.66    | 28.05    | Dnajb9  |         | 0.02    |          |          | Igfbp4   |         |         |          | 3.36     | Tnf       |         |         | 1114.80  | 1771.21  |
| Casp14  |         |         | 26.34    | 77.69    | Dnajb10 | 0.03    | 0.05    |          |          | Ikbkb    |         |         | 2.97     |          | Tnfrsf1a  |         |         |          | 0.31     |
| Cat     | 0       | 0.05    |          | 0.34     | Dnajb11 | 0.04    | 0.05    | 2064.20  | 2129.24  | Il1a     |         |         | 18.35    | 20.86    | Tnfrsf10b |         |         |          | 0.47     |
| Ccl2    |         |         | 17.24    | 7.50     | Dnajb12 | 0.01    | 0.05    | 2.00     |          | Il2      |         |         | 28.64    | 33.59    | Tnfrsf11b |         |         |          | 2.43     |
| Ccl20   |         |         | 78.49    | 92.03    | Dnajc4  |         |         | 3.37     |          | Il2ra    |         |         | 245.00   | 289.38   | Tnfrsf12a | 3.30    | 6.40    |          |          |
| Ccnd1   |         |         | 8.36     | 9.17     | Dnajc5  | 0.03    | 0.05    | 2.51     |          | Il4ra    |         |         | 61.20    | 52.99    | Tnfsf10   | 31.00   |         | 79.72    | 126.65   |
| Cct2    | 0.13    | 0.05    | 3.84     | 2.05     | Dnajc6  |         |         | 2688.28  | 1273.78  | Il10     |         |         | 186.91   | 478.88   | Tnfsf14   |         | 33.2    |          |          |
| Cct5    |         |         | 2.09     |          | Dnajc7  |         |         | 3.47     | 13.02    | Irf1     |         |         |          | 0.49     | Traf1     |         |         | 34.64    | 54.81    |
| Cct8    |         |         | 2.48     |          | Dnajc8  |         |         | 30.11    | 25.46    | Jun      |         |         | 0.24     | 0.28     | Traf2     |         |         | 14.04    | 22.30    |
| Cd40    |         |         | 236.57   | 375.86   | En1     |         |         | 9.89     | 11.61    | Lef1     |         |         | 24.97    | 24.04    | Traf3     |         |         | 4.46     | 7.99     |
| Cd40lg  |         |         | 1114.80  | 1771.21  | Ephx2   |         |         | 408.54   | 369.8    | Lep      |         |         | 79.77    | 93.53    | Trp53     |         |         | 0.36     | 0.42     |
| Cd5     |         |         | 54.02    | 63.34    | Fadd    |         |         | 39.02    | 61.99    | Lhx4     |         |         | 1114.80  | 1771.21  | Trp53bp2  |         |         | 5.07     | 3.19     |
| Cd70    |         |         | 1114.80  | 1771.21  | Faim    | 28.00   |         |          |          | LLI10    | 0.28    |         |          |          | Trp63     | 0.32    |         | 157.72   | 250.59   |
| Cdh1    |         |         | 94.37    | 110.65   | Fas     |         |         | 8.26     | 6.20     | Lta      |         |         | 74.22    | 87.02    | Trp73     |         |         | 154.65   | 245.70   |
| Cdkn1a  |         |         | 0.15     | 0.43     | Fasl    |         |         | 1114.80  | 1771.21  | Mapk8ip1 | 6.00    |         |          |          | Ubc       | 5.00    |         |          |          |
| Cdkn1b  |         |         |          | 0.45     | Fasn    |         |         | 4.14     | 7.54     | Mcl1     | 9.60    |         |          |          | Ugt1a6a   |         | 0.14    |          |          |
| Cdkn2a  |         |         | 2.53     |          | Fgf4    |         |         | 71.74    | 127.32   | Mdm2     |         |         | 0.48     |          | Vcam1     |         |         | 0.43     | 0.41     |
| Cebpb   |         |         | 0.28     | 0.27     | Fmo1    |         |         | 46.98    | 42.52    | MGDC     |         |         | 48.26    | 56.59    | Vegfa     |         |         | 0.48     | 0.22     |
| Ces1    |         |         | 453.64   | 126.62   | Fmo4    |         |         | 426.92   | 566.52   | Mmp7     |         |         | 39.67    | 46.51    | Wnt1      |         |         | 115.85   | 135.84   |
| Cflar   |         |         | 6.56     |          | Fmo5    |         | 0.13    | 42.62    | 38.58    | Mmp10    |         |         | 119.07   | 87.97    | Wnt2      |         |         | 51.09    | 59.91    |
| Cidea   |         |         | 871.65   | 1384.87  | Fn1     |         |         | 0.48     | 0.27     | Myc      |         |         | 0.22     | 0.04     | Xdh       |         |         | 53.11    | 48.08    |
| Cideb   |         |         | 11.08    | 17.61    | Foxa2   |         |         | 124.09   | 145.50   | Nab2     |         |         | 38.71    | 28.56    | Zc3hc1    | 14.00   |         |          | 2.16     |
