# Supplementary material
Source: PubMed Central journal article supplement (PMC4084927)
Supplement: NIHMS591938-supplement-02.pdf [file NIHMS591938-supplement-02.pdf]

| <b>Protein ID</b> | <b>Protein Name</b>                                                          | <b>APAP 24 hrs<br/>ratio re<br/>control</b> | <b>APAP 48 hrs<br/>ratio re<br/>control</b> | <b>NAPQI 24 hrs<br/>ratio re<br/>control</b> | <b>NAPQI 48 hrs<br/>ratio re<br/>control</b> |
|-------------------|------------------------------------------------------------------------------|---------------------------------------------|---------------------------------------------|----------------------------------------------|----------------------------------------------|
| IPI00108125       | Gene_Symbol=Eif5a Eukaryotic translation initiation factor 5A-1              |                                             |                                             | 2.729                                        | 2.5119                                       |
| IPI00109813       | Gene_Symbol=Hnrnpa0 heterogeneous nuclear ribonucleoprotein A0               |                                             |                                             | 0.4613                                       | 0.3311                                       |
| IPI00110588       | Gene_Symbol=Msn Moesin                                                       |                                             |                                             | 5.4954                                       | 5.1051                                       |
| IPI00113223       | Gene_Symbol=Fasn Fatty acid synthase                                         |                                             | 2.1677                                      |                                              |                                              |
| IPI00114358       | Gene_Symbol=Ptx3 Pentraxin-related protein PTX3                              |                                             | 2.3121                                      | 0.3133                                       |                                              |
| IPI00114491       | Gene_Symbol=Cdk1 Cell division control protein 2 homolog                     |                                             |                                             | 3.1623                                       | 2.421                                        |
| IPI00115564       | Gene_Symbol=Slc25a4 ADP/ATP translocase 1                                    |                                             |                                             | 0.4285                                       |                                              |
| IPI00116753       | Gene_Symbol=Etfa Electron transfer flavoprotein subunit alpha, mitochondrial |                                             |                                             | 0.4446                                       |                                              |
| IPI00116966       | Gene_Symbol=Asns Asparagine synthetase [glutamine-hydrolyzing]               |                                             | 3.7325                                      |                                              |                                              |
| IPI00117178       | Gene_Symbol=Aip AH receptor-interacting protein                              |                                             |                                             |                                              | 0.4699                                       |
| IPI00117689       | Gene_Symbol=Ptrf Polymerase I and transcript release factor                  |                                             |                                             | 0.4786                                       | 0.4966                                       |
| IPI00117978       | Gene_Symbol=Cox4i1 Cytochrome c oxidase subunit 4 isoform 1, mitochondrial   |                                             |                                             | 0.492                                        |                                              |
| IPI00118384       | Gene_Symbol=Ywhae 14-3-3 protein epsilon                                     |                                             | 2.884                                       | 3.0479                                       | 2.5119                                       |
| IPI00118676       | Gene_Symbol=Eif4a1 Eukaryotic initiation factor 4A-I                         |                                             |                                             | 2.9376                                       | 2.704                                        |
| IPI00118762       | Gene_Symbol=Bysl Bystin                                                      |                                             | 0.3105                                      |                                              |                                              |
| IPI00119063       | Gene_Symbol=Lrp1 Prolow-density lipoprotein receptor-related protein 1       |                                             | 0.278                                       | 0.3664                                       | 0.227                                        |
| IPI00119138       | Gene_Symbol=Uqcrc2 Cytochrome b-c1 complex subunit 2, mitochondrial          |                                             |                                             |                                              | 0.4831                                       |
| IPI00119111       | Gene_Symbol=Cnn3 Calponin-3                                                  | 0.2228                                      |                                             |                                              |                                              |
| IPI00120083       | Gene_Symbol=Tmem43 Transmembrane protein 43                                  |                                             |                                             | 0.3767                                       | 0.4055                                       |
| IPI00121079       | Gene_Symbol=Cyb5r3 Isoform 1 of NADH-cytochrome b5 reductase 3               |                                             |                                             | 0.2582                                       | 0.2606                                       |
| IPI00121514       | Gene_Symbol=Stip1 Stress-induced-phosphoprotein 1                            |                                             |                                             | 2.1086                                       |                                              |
| IPI00121552       | Gene_Symbol=Umps Uridine 5"-monophosphate synthase                           |                                             |                                             | 2.421                                        | 2.4889                                       |
| IPI00121758       | Gene_Symbol=Tardbp TAR DNA-binding protein 43                                |                                             |                                             |                                              | 0.492                                        |
| IPI00122399       | Gene_Symbol=Glg1 Golgi apparatus protein 1                                   |                                             |                                             | 0.0437                                       | 0.177                                        |
| IPI00122547       | Gene_Symbol=Vdac2 Voltage-dependent anion-selective channel protein 2        |                                             |                                             | 0.3105                                       |                                              |
| IPI00122565       | Gene_Symbol=Gdi2 Isoform 1 of Rab GDP dissociation inhibitor beta            |                                             |                                             | 2.6546                                       | 2.6062                                       |
| IPI00122743       | Gene_Symbol=Dars Aspartyl-tRNA synthetase, cytoplasmic                       |                                             | 2.208                                       |                                              |                                              |
| IPI00122815       | Gene_Symbol=P4hb Putative uncharacterized protein                            |                                             |                                             | 0.4571                                       | 0.4093                                       |
| IPI00122971       | Gene_Symbol=Ncam1 Isoform 1 of Neural cell adhesion molecule 1               |                                             |                                             |                                              | 0.4406                                       |
| IPI00123181       | Gene_Symbol=Myh9 Myosin-9                                                    |                                             |                                             |                                              | 0.4325                                       |
| IPI00123281       | Gene_Symbol=Lrrc59 Leucine-rich repeat-containing protein 59                 |                                             | 0.4613                                      |                                              |                                              |
| IPI00123313       | Gene_Symbol=Uba1 Ubiquitin-like modifier-activating enzyme 1                 |                                             | 2.6303                                      | 2.5586                                       | 2.3988                                       |
| IPI00123639       | Gene_Symbol=Calr Calreticulin                                                |                                             |                                             |                                              | 0.492                                        |
| IPI00123802       | Gene_Symbol=Hsph1 Isoform HSP105-alpha of Heat shock protein 105 kDa         |                                             |                                             | 2.6062                                       | 2.421                                        |
| IPI00123881       | Gene_Symbol=Mcm6 DNA replication licensing factor MCM6                       |                                             | 2.6303                                      |                                              |                                              |
| IPI00124223       | Gene_Symbol=Psmc1 Proteasome activator complex subunit 1                     |                                             | 2.9648                                      | 6.6069                                       | 6.2517                                       |
| IPI00124692       | Gene_Symbol=Taldo1 Transaldolase                                             |                                             | 2.2909                                      | 2.884                                        | 3.281                                        |

|             |                                                                                |        |        |        |        |
|-------------|--------------------------------------------------------------------------------|--------|--------|--------|--------|
| IPI00125931 | Gene_Symbol=Cstb Cystatin-B                                                    |        |        | 4.3251 | 2.1086 |
| IPI00126083 | Gene_Symbol=Ehd1 EH domain-containing protein 1                                |        |        |        | 2.3768 |
| IPI00126396 | Gene_Symbol=Mcm7 Putative uncharacterized protein                              |        | 2.0893 |        |        |
| IPI00127417 | Gene_Symbol=Nme2 Nucleoside diphosphate kinase B                               |        | 2.208  | 6.1944 | 5.3951 |
| IPI00127841 | Gene_Symbol=Slc25a5 ADP/ATP translocase 2                                      |        |        | 0.3945 |        |
| IPI00127989 | Gene_Symbol=Ptges3;LOC100048119;Gm9769 Prostaglandin E synthase 3              |        | 3.1046 | 4.2073 | 4.5709 |
| IPI00129163 | Gene_Symbol=Tmlhe Trimethyllysine dioxygenase, mitochondrial                   |        |        | 0.278  | 0.2168 |
| IPI00129240 | Gene_Symbol=Vtn Vitronectin                                                    |        | 2.9648 |        |        |
| IPI00129526 | Gene_Symbol=Hsp90b1 Endoplasmin                                                |        |        | 0.4571 | 0.4487 |
| IPI00129685 | Gene_Symbol=Tpt1;Gm14456 Translationally-controlled tumor protein              |        |        | 5.2    | 3.9084 |
| IPI00130280 | Gene_Symbol=Atp5a1 ATP synthase subunit alpha, mitochondrial                   |        |        |        | 0.4742 |
| IPI00130589 | Gene_Symbol=Sod1 Superoxide dismutase [Cu-Zn]                                  |        | 6.8549 | 6.368  | 6.4863 |
| IPI00130883 | Gene_Symbol=Rbm3 Putative RNA-binding protein 3                                |        | 0.3981 |        | 0.4325 |
| IPI00131845 | Gene_Symbol=Psm6 Proteasome subunit alpha type-6                               |        | 2.0701 | 2.466  | 2.2284 |
| IPI00132208 | Gene_Symbol=Dnaja1 DnaJ homolog subfamily A member 1                           |        | 0.4656 |        |        |
| IPI00132388 | Gene_Symbol=Bzw1 Basic leucine zipper and W2 domain-containing protein 1       |        |        | 2.466  |        |
| IPI00132456 | Gene_Symbol=2700060E02Rik UPF0568 protein C14orf166 homolog                    |        | 2.2909 |        |        |
| IPI00132475 | Gene_Symbol=Lman1 Putative uncharacterized protein                             |        |        | 0.4786 |        |
| IPI00133240 | Gene_Symbol=Uqcrcf1 Cytochrome b-c1 complex subunit Rieske, mitochondrial      |        |        | 0.3565 | 0.3802 |
| IPI00133428 | Gene_Symbol=Psmc1 26S protease regulatory subunit 4                            |        | 2.5823 | 2.4434 | 2.2491 |
| IPI00134961 | Gene_Symbol=Acadm Medium-chain specific acyl-CoA dehydrogenase, mitochondrial  |        |        | 0.4742 |        |
| IPI00135186 | Gene_Symbol=Calu Calumenin                                                     |        |        | 0.492  | 0.4365 |
| IPI00135640 | Gene_Symbol=Psmc5 26S protease regulatory subunit 8                            |        | 2.355  | 2.1677 | 3.4674 |
| IPI00135686 | Gene_Symbol=Ppib Peptidyl-prolyl cis-trans isomerase B                         |        |        | 0.4742 | 0.4365 |
| IPI00135969 | Gene_Symbol=Adss Adenylosuccinate synthetase isozyme 2                         |        |        |        | 2.4434 |
| IPI00137227 | Gene_Symbol=Rab2a Ras-related protein Rab-2A                                   | 2.3008 |        |        |        |
| IPI00137409 | Gene_Symbol=Tkt Transketolase                                                  |        | 2.2909 |        | 2.7797 |
| IPI00153740 | Gene_Symbol=Ahsa1 Activator of 90 kDa heat shock protein ATPase homolog 1      |        |        | 2.4434 | 2.4434 |
| IPI00153792 | Gene_Symbol=2410015M20Rik Protein QIL1                                         |        |        | 0.3221 | 0.2535 |
| IPI00163011 | Gene_Symbol=Txndc5 Thioredoxin domain-containing protein 5                     |        |        | 0.2655 | 0.2466 |
| IPI00169472 | Gene_Symbol=Aldh1l2 Probable 10-formyltetrahydrofolate dehydrogenase ALDH1L2   |        |        | 0.4169 |        |
| IPI00172197 | Gene_Symbol=Anln Actin-binding protein anillin                                 |        | 0.3251 |        |        |
| IPI00221798 | Gene_Symbol=Rcn3 Reticulocalbin-3                                              |        |        | 0.4018 | 0.2729 |
| IPI00222496 | Gene_Symbol=Pdia6 Putative uncharacterized protein                             |        |        | 0.4742 | 0.4831 |
| IPI00222560 | Gene_Symbol=Eif4h Isoform Short of Eukaryotic translation initiation factor 4H |        |        | 3.281  | 2.9923 |
| IPI00223047 | Gene_Symbol=Ckap4 Cytoskeleton-associated protein 4                            |        |        | 0.1941 | 0.2399 |
| IPI00223060 | Gene_Symbol=Pck2 phosphoenolpyruvate carboxykinase [GTP], mitochondrial        |        |        | 0.3251 | 0.2655 |
| IPI00223757 | Gene_Symbol=Akr1b3 Aldose reductase                                            |        | 2.0893 | 3.6308 | 3.7325 |

|             |                                                                                           |        |        |        |        |
|-------------|-------------------------------------------------------------------------------------------|--------|--------|--------|--------|
| IPI00224740 | Gene_Symbol=Pfn1 Profilin-1                                                               |        |        | 4.1305 | 3.281  |
| IPI00226872 | Gene_Symbol=Efh2 Putative uncharacterized protein                                         |        |        |        | 2.0137 |
| IPI00227749 | Gene_Symbol=Ddx19b Putative uncharacterized protein                                       | 2.3891 |        |        |        |
| IPI00228385 | Gene_Symbol=G6pdx Glucose-6-phosphate 1-dehydrogenase X                                   |        | 3.4674 | 3.3419 | 4.3652 |
| IPI00228616 | Gene_Symbol=Hist1h1a Histone H1.1                                                         |        |        | 0.3945 | 0.2831 |
| IPI00228633 | Gene_Symbol=Gpi1 Glucose-6-phosphate isomerase                                            |        |        | 2.5351 | 2.729  |
| IPI00229080 | Gene_Symbol=Hsp90ab1 Putative uncharacterized protein                                     |        | 2.1878 | 3.3113 | 3.0761 |
| IPI00229534 | Gene_Symbol=Marcks Myristoylated alanine-rich C-kinase substrate                          |        | 0.2884 | 0.1941 | 0.2168 |
| IPI00230108 | Gene_Symbol=Pdia3 Protein disulfide-isomerase A3                                          |        |        |        | 0.4613 |
| IPI00230133 | Gene_Symbol=Hist1h1b Histone H1.5                                                         |        |        | 0.3105 | 0.182  |
| IPI00230139 | Gene_Symbol=Fkbp4 Peptidyl-prolyl cis-trans isomerase FKBP4                               |        |        | 2.2491 | 2.0512 |
| IPI00230264 | Gene_Symbol=H2afx Histone H2A.x                                                           |        |        | 0.2228 | 0.1706 |
| IPI00230394 | Gene_Symbol=Lmnb1 Lamin-B1                                                                |        | 0.3945 | 0.302  | 0.3873 |
| IPI00230440 | Gene_Symbol=Ahcy;Gm9826 Adenosylhomocysteinase                                            |        | 3.3113 | 2.8314 | 2.8314 |
| IPI00230598 | Gene_Symbol=Fxr1 Isoform B of Fragile X mental retardation syndrome-related protein 1     |        |        | 3.5645 | 2.5351 |
| IPI00262743 | Gene_Symbol=Tecr Trans-2,3-enoyl-CoA reductase                                            |        |        | 0.3133 | 0.413  |
| IPI00270326 | Gene_Symbol=Psmc2 Putative uncharacterized protein                                        |        |        | 2.2491 | 2.5823 |
| IPI00277930 | Gene_Symbol=Capg Putative uncharacterized protein                                         |        |        | 2.1878 | 2.7542 |
| IPI00307837 | Gene_Symbol=Eef1a1 Elongation factor 1-alpha 1                                            |        | 3.6983 | 6.8549 | 6.6681 |
| IPI00308498 | Gene_Symbol=Casp3 Caspase-3                                                               |        | 2.2699 | 2.5119 | 2.3988 |
| IPI00308938 | Gene_Symbol=Capn2 Calpain-2 catalytic subunit                                             |        |        | 2.3335 | 2.704  |
| IPI00309035 | Gene_Symbol=Rpn1 Dolichyl-diphosphooligosaccharide--protein glycosyltransferase subunit 1 |        |        |        | 0.4966 |
| IPI00309398 | Gene_Symbol=Mcm5 DNA replication licensing factor MCM5                                    |        | 2.5586 | 2.3335 |        |
| IPI00310701 | Gene_Symbol=Lmf2 Lipase maturation factor 2                                               |        | 0.4406 | 0.3802 |        |
| IPI00311236 | Gene_Symbol=Rpl7 60S ribosomal protein L7                                                 |        |        |        | 0.4613 |
| IPI00313817 | Gene_Symbol=Hdgf Hepatoma-derived growth factor                                           |        | 2.3121 | 3.4041 | 4.0179 |
| IPI00314748 | Gene_Symbol=Wdr1 WD repeat-containing protein 1                                           |        | 2.0512 | 3.02   | 2.8054 |
| IPI00315100 | Gene_Symbol=Rhoa Transforming protein RhoA                                                |        |        |        | 0.4571 |
| IPI00316479 | Gene_Symbol=Ptpn11 Isoform 2 of Tyrosine-protein phosphatase non-receptor type 11         |        | 2.9648 | 2.2909 | 2.1086 |
| IPI00318048 | Gene_Symbol=Nop56 Nucleolar protein 56                                                    |        |        |        | 0.4875 |
| IPI00318614 | Gene_Symbol=Idh2 Isocitrate dehydrogenase [NADP], mitochondrial                           |        |        | 0.1722 | 0.1419 |
| IPI00318841 | Gene_Symbol=Eef1g Elongation factor 1-gamma                                               |        |        | 2.5586 | 2.2699 |
| IPI00319965 | Gene_Symbol=Psm6 26S proteasome non-ATPase regulatory subunit 6                           |        | 2.0324 |        | 2.9107 |
| IPI00319992 | Gene_Symbol=Hspa5 78 kDa glucose-regulated protein                                        |        |        |        | 0.4325 |
| IPI00320016 | Gene_Symbol=Nono Isoform 1 of Non-POU domain-containing octamer-binding protein           |        |        |        | 0.4742 |

|             |                                                                                        |        |        |         |         |
|-------------|----------------------------------------------------------------------------------------|--------|--------|---------|---------|
| IPI00320208 | Gene_Symbol=Eef1b2 Elongation factor 1-beta                                            |        |        | 2.0137  |         |
| IPI00321308 | Gene_Symbol=Aars Alanyl-tRNA synthetase, cytoplasmic                                   |        | 3.6983 |         |         |
| IPI00322312 | Gene_Symbol=Arhgdia Rho GDP-dissociation inhibitor 1                                   |        | 3.2509 | 3.8019  | 3.767   |
| IPI00323179 | Gene_Symbol=Gdi1 Rab GDP dissociation inhibitor alpha                                  |        | 2.5586 |         |         |
| IPI00323357 | Gene_Symbol=Hspa8 Heat shock cognate 71 kDa protein                                    |        |        | 2.7797  |         |
| IPI00323496 | Gene_Symbol=Iigp1 Interferon-inducible GTPase 1                                        |        | 4.8306 | 18.0302 | 17.2187 |
| IPI00323644 | Gene_Symbol=Gart Isoform Long of Trifunctional purine biosynthetic protein adenosine-3 |        | 2.884  | 2.4889  | 3.1046  |
| IPI00330303 | Gene_Symbol=LOC100046995;Atic Bifunctional purine biosynthesis protein PURH            |        | 2.8576 | 4.6132  | 3.8019  |
| IPI00330688 | Gene_Symbol=Mrps7 28S ribosomal protein S7, mitochondrial                              |        |        |         | 0.0738  |
| IPI00330804 | Gene_Symbol=Hsp90aa1 Heat shock protein HSP 90-alpha                                   |        | 2.2491 | 4.7863  | 4.0179  |
| IPI00331016 | Gene_Symbol=Sec24b Sec24 related gene family, member B                                 |        |        | 2.5351  | 2.5351  |
| IPI00331444 | Gene_Symbol=Ipo7 Importin-7                                                            |        | 2.2699 | 2.5823  | 3.4041  |
| IPI00331556 | Gene_Symbol=Hspa4 Heat shock 70 kDa protein 4                                          |        | 2.0701 | 3.3729  | 2.9107  |
| IPI00331597 | Gene_Symbol=Hist1h1d Histone H1.3                                                      |        |        | 0.3698  | 0.2355  |
| IPI00336873 | Gene_Symbol=Hnrnpd Isoform 3 of Heterogeneous nuclear ribonucleoprotein D0             |        | 0.3981 |         | 0.4875  |
| IPI00339885 | Gene_Symbol=Col6a1 Collagen alpha-1(VI) chain                                          |        | 0.3532 | 0.2128  | 0.1629  |
| IPI00353563 | Gene_Symbol=Fscn1 Fascin                                                               |        | 2.3335 | 2.2909  |         |
| IPI00355961 | Gene_Symbol=Tmed1 Isoform 1 of Transmembrane emp24 domain-containing protein 1         |        |        | 0.2992  | 0.4207  |
| IPI00379876 | Gene_Symbol=Ttll12 Tubulin--tyrosine ligase-like protein 12                            | 2.3976 | 2.3988 |         |         |
| IPI00395038 | Gene_Symbol=Xpo1 Exportin-1                                                            |        | 2.1281 | 2.421   | 2.5586  |
| IPI00399686 | Gene_Symbol=Heatr3 HEAT repeat-containing protein 3                                    |        | 4.8306 | 6.2517  | 6.792   |
| IPI00405227 | Gene_Symbol=Vcl Vinculin                                                               |        |        | 2.3988  |         |
| IPI00407130 | Gene_Symbol=Pkm2 Isoform M2 of Pyruvate kinase isozymes M1/M2                          |        | 4.529  | 6.5464  | 6.5464  |
| IPI00407692 | Gene_Symbol=Atp6v1a Isoform 1 of V-type proton ATPase catalytic subunit A              |        | 2.208  |         |         |
| IPI00407764 | Gene_Symbol=Dis3 Exosome complex exonuclease RRP44                                     |        |        | 3.0761  | 2.3335  |
| IPI00410819 | Gene_Symbol=Ddost Putative uncharacterized protein                                     |        |        |         | 0.2128  |
| IPI00410937 | Gene_Symbol=Rbm8a Isoform 1 of RNA-binding protein 8A                                  |        | 0.4365 |         |         |
| IPI00420329 | Gene_Symbol=Snrnp200 Small nuclear ribonucleoprotein 200                               |        | 0.413  |         |         |
| IPI00420706 | Gene_Symbol=Lrpprc Leucine-rich PPR motif-containing protein, mitochondrial            |        | 0.3837 |         |         |
| IPI00420807 | Gene_Symbol=Sfrs1;LOC100048559 Isoform 1 of Splicing factor, arginine/serine-rich 1    |        |        | 0.4446  | 0.4966  |
| IPI00453608 | Gene_Symbol=Tgtp1;Gm12185;Tgtp2 T-cell specific GTPase 2                               |        | 2.1281 | 6.2517  | 5.5976  |
| IPI00453826 | Gene_Symbol=Matr3 Matrin-3                                                             |        |        |         | 0.3767  |
| IPI00454028 | Gene_Symbol=Gbp7 guanylate binding protein 7                                           |        |        | 2.7797  | 2.3768  |
| IPI00457898 | Gene_Symbol=Pgam1 Phosphoglycerate mutase 1                                            |        | 3.1915 | 4.0551  | 4.0179  |
| IPI00459381 | Gene_Symbol=Ddx18 ATP-dependent RNA helicase DDX18                                     |        | 0.3908 |         |         |

|             |                                                                                                                                                                     |        |        |        |        |
|-------------|---------------------------------------------------------------------------------------------------------------------------------------------------------------------|--------|--------|--------|--------|
| IPI00461413 | Gene_Symbol=Gm5437 Putative uncharacterized protein Gm5437                                                                                                          |        | 0.3767 |        |        |
| IPI00462072 | Gene_Symbol=Eno1;LOC100044223;Gm5506 Alpha-enolase                                                                                                                  |        | 2.3768 | 4.0926 | 3.02   |
| IPI00466069 | Gene_Symbol=Eef2 Elongation factor 2                                                                                                                                |        | 3.9084 | 5.5463 | 5.0119 |
| IPI00467004 | Gene_Symbol=Stat1 Putative uncharacterized protein                                                                                                                  |        |        | 3.0479 | 3.4041 |
| IPI00467447 | Gene_Symbol=Iqgap1 Ras GTPase-activating-like protein IQGAP1                                                                                                        |        |        | 2.0701 |        |
| IPI00467833 | Gene_Symbol=Tpi1 triosephosphate isomerase                                                                                                                          |        | 3.02   | 2.5351 | 2.9376 |
| IPI00468273 | Gene_Symbol=Plec Isoform PLEC-1E of Plectin-1                                                                                                                       |        | 0.3105 |        | 0.4093 |
| IPI00468481 | Gene_Symbol=Atp5b ATP synthase subunit beta, mitochondrial                                                                                                          |        |        | 0.4875 |        |
| IPI00468900 | Gene_Symbol=Atp2a2 Isoform SERCA2A of Sarcoplasmic/endoplasmic reticulum calcium ATPase 2                                                                           |        |        | 0.3499 |        |
| IPI00469307 | Gene_Symbol=Lrpap1 Alpha-2-macroglobulin receptor-associated protein                                                                                                |        |        | 0.4529 | 0.4365 |
| IPI00470152 | Gene_Symbol=Ubb;Rps27a;Ubc;Gm6111 ubiquitin                                                                                                                         |        |        | 2.466  |        |
| IPI00473314 | Gene_Symbol=Lig1 DNA ligase 1                                                                                                                                       |        | 2.6062 |        | 2.3768 |
| IPI00474281 | Gene_Symbol=Gm13910 similar to Hydroxyacyl-Coenzyme A dehydrogenase/3-ketoacyl-Coenzyme A thiolase/enoyl-Coenzyme A hydratase (trifunctional protein), beta subunit |        |        | 0.4831 |        |
| IPI00475248 | Gene_Symbol=Eif2c2 Argonaute 2 protein (Fragment)                                                                                                                   |        |        | 2.3335 | 2.9923 |
| IPI00475256 | Gene_Symbol=Gm13835 similar to proteasome alpha7/C8 subunit                                                                                                         |        |        |        | 2.1086 |
| IPI00480507 | Gene_Symbol=Prpf19 Isoform 1 of Pre-mRNA-processing factor 19                                                                                                       |        |        |        | 0.492  |
| IPI00515360 | Gene_Symbol=Hspg2 basement membrane-specific heparan sulfate proteoglycan core protein                                                                              |        | 0.3499 | 0.2032 | 0.1803 |
| IPI00553798 | Gene_Symbol=Ahnak AHNAK nucleoprotein isoform 1                                                                                                                     |        | 0.3767 |        |        |
| IPI00554989 | Gene_Symbol=Ppia Peptidyl-prolyl cis-trans isomerase                                                                                                                |        |        | 2.6546 | 2.5586 |
| IPI00555000 | Gene_Symbol=Uqcrb Cytochrome b-c1 complex subunit 7                                                                                                                 |        |        | 0.3467 | 0.4487 |
| IPI00555069 | Gene_Symbol=Pgk1 Phosphoglycerate kinase 1                                                                                                                          |        | 2.9648 | 3.8371 | 3.767  |
| IPI00555150 | Gene_Symbol=Snx3 Sorting nexin-3                                                                                                                                    |        | 4.8753 | 3.6983 | 4.1687 |
| IPI00556723 | Gene_Symbol=Dnm1l Isoform 1 of Dynamin-1-like protein                                                                                                               |        | 3.3729 | 2.6546 | 2.729  |
| IPI00556768 | Gene_Symbol=Thrap3 Thyroid hormone receptor-associated protein 3                                                                                                    |        |        |        | 0.4699 |
| IPI00606586 | Gene_Symbol=Smc2 Putative uncharacterized protein                                                                                                                   |        | 2.729  | 3.4041 | 2.8054 |
| IPI00620222 | Gene_Symbol=Myo1c Isoform 1 of Myosin-Ic                                                                                                                            |        | 0.4831 | 0.4613 |        |
| IPI00620362 | Gene_Symbol=Hnrnpl Heterogeneous nuclear ribonucleoprotein L                                                                                                        |        |        | 0.4055 | 0.3467 |
| IPI00622968 | Gene_Symbol=Gm9819 Putative uncharacterized protein Gm9819                                                                                                          |        |        | 2.4434 |        |
| IPI00623776 | Gene_Symbol=LOC674678 similar to histone H4                                                                                                                         |        |        | 0.2228 | 0.2109 |
| IPI00624863 | Gene_Symbol=Paics Putative uncharacterized protein                                                                                                                  |        |        |        | 2.1086 |
| IPI00625129 | Gene_Symbol=Ftl2 ferritin light chain 2                                                                                                                             | 2.2432 |        |        |        |
| IPI00648295 | Gene_Symbol=Kdm1a Amine oxidase (Flavin containing) domain 2                                                                                                        |        |        |        | 0.3698 |
| IPI00652694 | Gene_Symbol=Psmc3 Putative uncharacterized protein                                                                                                                  |        | 2.1281 | 2.3335 | 2.3768 |
| IPI00652811 | Gene_Symbol=Anxa1 Putative uncharacterized protein                                                                                                                  |        |        | 3.0761 | 2.5351 |
| IPI00652902 | Gene_Symbol=Gnai2 Putative uncharacterized protein                                                                                                                  |        |        | 0.4571 |        |
| IPI00653598 | Gene_Symbol=Uqcrcl cytochrome b-c1 complex subunit 1, mitochondrial                                                                                                 |        |        | 0.4325 |        |

|             |                                                                                                                           |  |        |         |         |
|-------------|---------------------------------------------------------------------------------------------------------------------------|--|--------|---------|---------|
|             | precursor                                                                                                                 |  |        |         |         |
| IPI00653794 | Gene_Symbol=Rap1gds1 RAP1, GTP-GDP dissociation stimulator 1 isoform a                                                    |  |        | 2.466   | 3.2509  |
| IPI00654120 | Gene_Symbol=Dtx3l Isoform 1 of E3 ubiquitin-protein ligase DTX3L                                                          |  | 0.3162 |         |         |
| IPI00663627 | Gene_Symbol=Flnb Filamin-B                                                                                                |  |        | 2.0324  | 2.1478  |
| IPI00670004 | Gene_Symbol=Gm6793 EG627828 protein                                                                                       |  |        |         | 0.4285  |
| IPI00676841 | Gene_Symbol=Gm5081 hypothetical protein LOC328099                                                                         |  | 6.5464 | 6.1944  | 0.4285  |
| IPI00676914 | Gene_Symbol=LOC675857 similar to valosin isoform 1                                                                        |  |        | 2.6792  | 4.6989  |
| IPI00742275 | Gene_Symbol=Kdm2a Isoform 1 of Lysine-specific demethylase 2A                                                             |  |        | 3.3419  |         |
| IPI00751369 | Gene_Symbol=Ldha L-lactate dehydrogenase A chain isoform 2                                                                |  | 2.466  | 3.4995  | 2.9648  |
| IPI00757312 | Gene_Symbol=Myh10 Putative uncharacterized protein                                                                        |  |        | 0.2805  | 0.3802  |
| IPI00760000 | Gene_Symbol=Ywhab Isoform Short of 14-3-3 protein beta/alpha                                                              |  |        | 3.1046  | 2.6062  |
| IPI00761611 | Gene_Symbol=- Ring finger protein 213                                                                                     |  | 2.9376 | 4.4875  | 5.0582  |
| IPI00762362 | Gene_Symbol=Rpl22l1 Isoform 2 of 60S ribosomal protein L22-like 1                                                         |  |        |         | 0.4325  |
| IPI00776047 | Gene_Symbol=Aifm1 Apoptosis-inducing factor, mitochondrion-associated 1                                                   |  |        | 0.4966  | 0.4656  |
| IPI00776084 | Gene_Symbol=Atp5c1 ATP synthase gamma chain                                                                               |  |        | 0.3945  |         |
| IPI00788337 | Gene_Symbol=Pitrm1 Isoform 2 of Presequence protease, mitochondrial                                                       |  |        | 0.4285  |         |
| IPI00798527 | Gene_Symbol=Tnpo1 Isoform 2 of Transportin-1                                                                              |  |        | 2.4889  | 2.9923  |
| IPI00817004 | Gene_Symbol=Hnrnpa1 Isoform Long of Heterogeneous nuclear ribonucleoprotein A1                                            |  | 0.4656 |         |         |
| IPI00828463 | Gene_Symbol=Noc2l nucleolar complex protein 2 homolog                                                                     |  | 0.4093 |         |         |
| IPI00828479 | Gene_Symbol=Acox1 Acyl-Coenzyme A oxidase 1, palmitoyl, isoform CRA_a                                                     |  |        |         |         |
| IPI00830803 | Gene_Symbol=Fbln2 fibulin-2 isoform b                                                                                     |  | 0.4742 | 0.4055  |         |
| IPI00845523 | Gene_Symbol=Ubr4 Isoform 3 of E3 ubiquitin-protein ligase UBR4                                                            |  | 2.8054 | 3.9811  | 4.1687  |
| IPI00845652 | Gene_Symbol=Ogdh Isoform 3 of 2-oxoglutarate dehydrogenase, mitochondrial                                                 |  |        | 0.2679  |         |
| IPI00848977 | Gene_Symbol=LOC100046823 similar to proliferating cell nuclear antigen (DNA polymerase delta auxiliary protein) isoform 1 |  | 2.3335 | 2.6062  |         |
| IPI00849478 | Gene_Symbol=LOC100047252 similar to Phosphoserine aminotransferase 1 isoform 1                                            |  | 5.1051 | 4.5709  | 4.4055  |
| IPI00850695 | Gene_Symbol=- similar to Anp32b protein                                                                                   |  | 2.2284 | 2.5586  | 2.704   |
| IPI00853914 | Gene_Symbol=LOC100045191 similar to heterogeneous nuclear ribonucleoprotein A2/B1                                         |  | 0.2938 |         |         |
| IPI00853967 | Gene_Symbol=Pth2 Peptidyl-tRNA hydrolase 2, mitochondrial                                                                 |  |        |         | 0.3873  |
| IPI00856379 | Gene_Symbol=Aldoa fructose-bisphosphate aldolase A isoform 1                                                              |  | 2.9923 | 5.0119  | 4.4055  |
| IPI00857740 | Gene_Symbol=Blvr27 27 kDa protein                                                                                         |  |        | 2.0324  | 2.4434  |
| IPI00857970 | Gene_Symbol=Cav1 Putative uncharacterized protein Cav1                                                                    |  |        | 0.3873  | 0.3802  |
| IPI00858249 | Gene_Symbol=Eif4g1 eukaryotic translation initiation factor 4 gamma 1 isoform b                                           |  |        |         | 2.0512  |
| IPI00869371 | Gene_Symbol=Cnbp cellular nucleic acid-binding protein isoform 2                                                          |  | 0.3499 |         |         |
| IPI00874482 | Gene_Symbol=Actg1 Actin, cytoplasmic 2                                                                                    |  |        |         | 0.3499  |
| IPI00875218 | Gene_Symbol=Anxa6 76 kDa protein                                                                                          |  |        | 0.2965  | 0.492   |
| IPI00877279 | Gene_Symbol=Anxa3 annexin A3                                                                                              |  | 5.4954 | 10.8643 | 10.5682 |

|             |                                                                         |  |        |        |        |
|-------------|-------------------------------------------------------------------------|--|--------|--------|--------|
| IPI00880252 | Gene_Symbol=Serpinh1 serpin H1 precursor                                |  | 0.4742 | 0.1959 | 0.2148 |
| IPI00881858 | Gene_Symbol=Leprel Leprecan 1                                           |  |        | 0.4093 | 0.3532 |
| IPI00889294 | Gene_Symbol=Irgm1 Isoform 2 of Immunity-related GTPase family M protein |  |        | 3.1046 | 3.2509 |
| IPI00890027 | Gene_Symbol=Lgals3 19 kDa protein                                       |  | 0.3373 | 4.1687 | 4.4055 |
| IPI00890117 | Gene_Symbol=Cfl1 Cofilin-1                                              |  | 3.5975 | 3.767  | 4.0551 |
| IPI00894579 | Gene_Symbol=Pgd 6-phosphogluconate dehydrogenase, decarboxylating       |  |        |        | 2.0324 |
| IPI00918997 | Gene_Symbol=Nars asparaginyl-tRNA synthetase, cytoplasmic isoform 2     |  | 2.466  | 2.7542 | 2.5351 |
| IPI00921658 | Gene_Symbol=Flna Filamin, alpha                                         |  |        |        | 0.4786 |
| IPI00923656 | Gene_Symbol=Baz1b Isoform 1 of Tyrosine-protein kinase BAZ1B            |  |        | 0.4831 | 0.4656 |
| IPI00927975 | Gene_Symbol=Pfcp Putative uncharacterized protein                       |  |        | 2.0512 |        |
| IPI00928073 | Gene_Symbol=Sqstm1 Putative uncharacterized protein Sqstm1              |  | 2.208  | 4.8753 | 3.4674 |
| IPI00929813 | Gene_Symbol=Nap1l1 nucleosome assembly protein 1-like 1 isoform 1       |  | 2.5119 | 2.3335 | 2.7797 |
| IPI00929863 | Gene_Symbol=Pdgfrb Beta-type platelet-derived growth factor receptor    |  | 0.3192 |        |        |
| IPI00943445 | Gene_Symbol=Iars isoleucyl-tRNA synthetase, cytoplasmic                 |  | 4.3652 | 2.6062 | 2.6546 |
| IPI00944126 | Gene_Symbol=Tpm1 tropomyosin alpha-1 chain isoform 8                    |  |        | 0.3221 | 0.3981 |
| IPI00944143 | Gene_Symbol=Serpnb6a serpin B6 isoform a                                |  |        | 3.6983 | 3.8726 |
| IPI00944194 | Gene_Symbol=Fkbp10 FK506-binding protein 10 isoform 1                   |  |        | 0.2443 | 0.2754 |
| IPI00953783 | Gene_Symbol=Mthfd1 C-1-tetrahydrofolate synthase, cytoplasmic           |  | 2.2491 |        |        |
| IPI00955082 | Gene_Symbol=H2afy core histone macro-H2A.1 isoform 2                    |  |        | 0.2729 | 0.4571 |
| RRRRRnull   | REVERSED Gene_Symbol=2610034M16Rik Putative uncharacterized protein     |  | 0.4613 | 0.4875 |        |

**Supplemental Table 2:** List of the proteins significantly up or down regulated ( $\geq 2$ -fold change) by treatment with APAP or NAPQI for 24 and 48 hours. This list includes the 111 proteins belonging to the five groups identified by gene expression profiling (oxidative stress, xenobiotic metabolism, cell death, protein ubiquitination and ER stress) depicted in **Fig. 3**
